# Supplementary material
Source: ML conference proceedings conference paper supplement (https://openreview.net/forum?id=hYEV8QmaOt)
Supplement: supplementary_material [file attachment]

## A APPENDIX

Table 1: Taxonomy of victim detectors

| Methods                                   | Views |                                       |                                      | Backbone    | scales of supervision |      |       |
|-------------------------------------------|-------|---------------------------------------|--------------------------------------|-------------|-----------------------|------|-------|
|                                           | RGB   | Noise                                 | Fusion                               |             | pixel                 | edge | image |
| SPAN (Hu et al. (2020))                   | +     | SRM filter, BayarConv2D               | early fusion (feature concatenation) | WiderVGG    | +                     | -    | -     |
| MVSS-Net (Chen et al. (2021))             | +     | BayarConv2D                           | late fusion (dual attention)         | FCN         | +                     | +    | +     |
| IF-OSN (Wu et al. (2022))                 | -     | SE-U-Net                              | -                                    | DNN         | +                     | -    | -     |
| TruFor (Guillaro et al. (2023))           | +     | DnCNN                                 | early fusion (cross modal fusion)    | Transformer | +                     | -    | -     |
| MMFusion-IML (Triaridis & Mezaris (2024)) | +     | SRM filter, BayarConv2D, Noiseprint++ | early fusion (cross modal fusion)    | CNN         | +                     | -    | -     |
| EITLNet (Guo et al. (2024))               | +     | CW-HPF                                | late fusion (feature concatenation)  | Transformer | +                     | -    | -     |

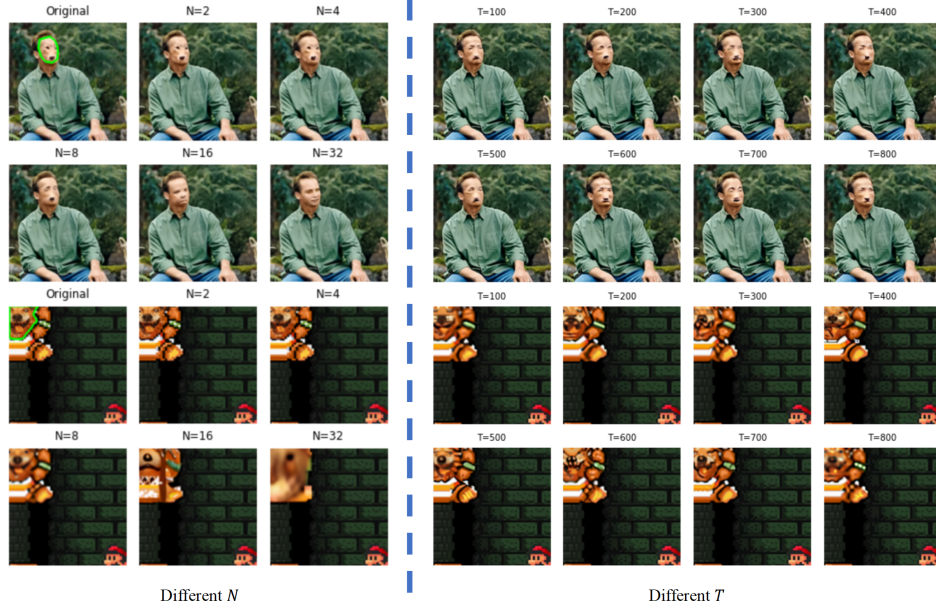

Figure 1: Illustration of effects of different  $N$  and  $T$  on image content. Different  $N$  and  $T$  result in different refined image contents. Overall, greater  $N$  leads to less original content preserved, while larger  $T$  generates more harmonious images.

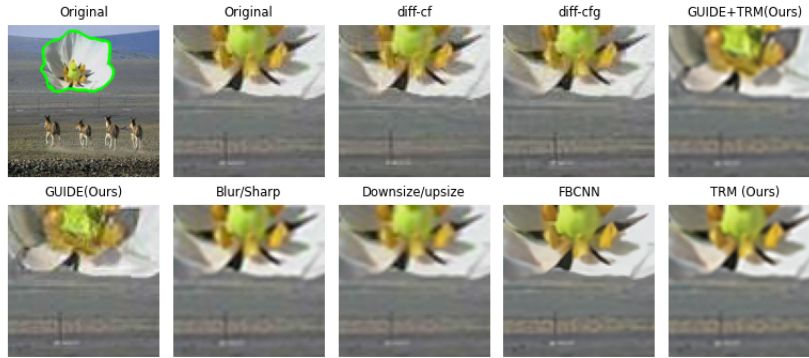

Figure 2: Texture and quality comparisons between different anti-forensics methods. GUIDE generates content-specific details compatible with authentic regions.

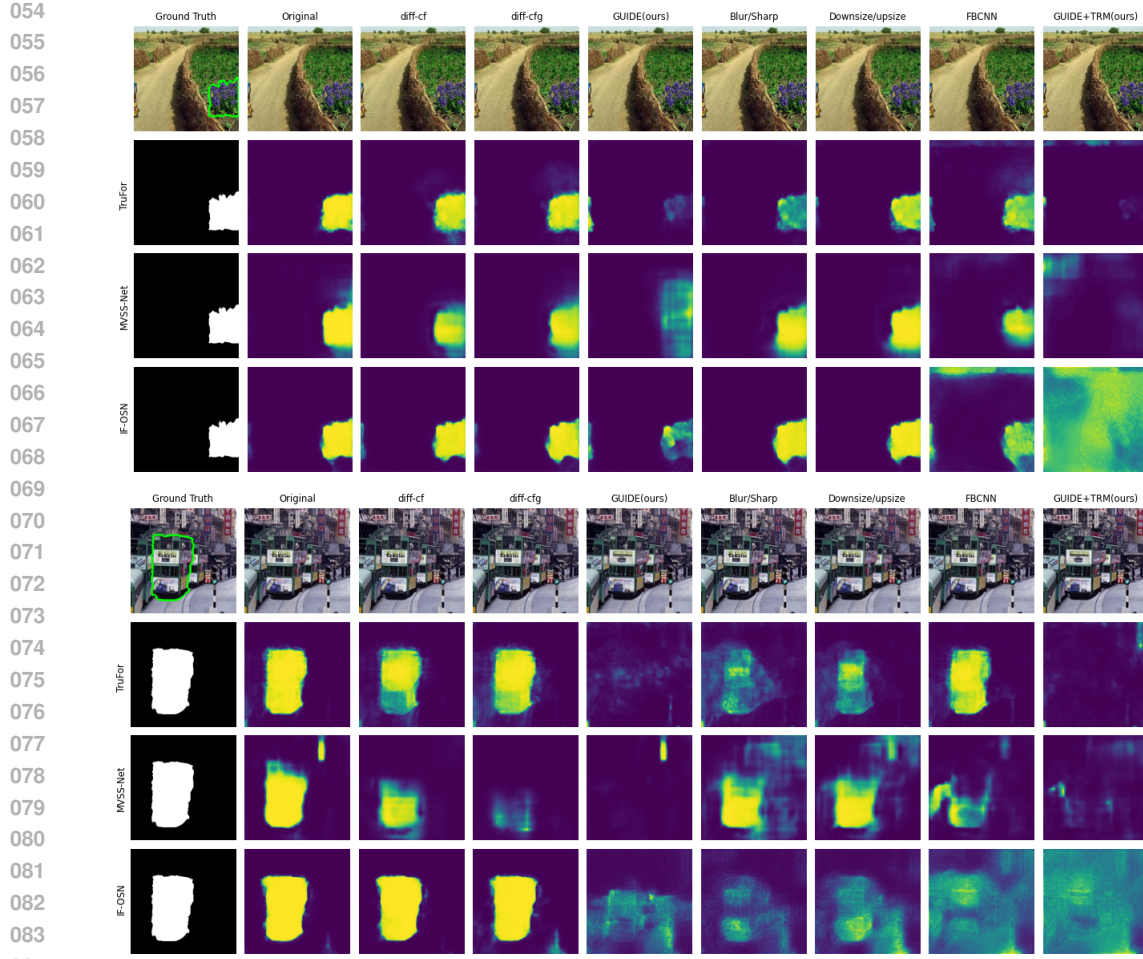

Figure 3: Comparison of anti-forensics performance on different detectors with their localization maps. As compared to other diffusion based method, *Diff-cf* and *Diff-cfg*, GUIDE more effectively fools image anti-forensics, while TRM enhances such performance.

## REFERENCES

- Xinru Chen, Chengbo Dong, Jiaqi Ji, Juan Cao, and Xirong Li. Image manipulation detection by multi-view multi-scale supervision. In *ICCV*, 2021.
- Fabrizio Guillaro, Davide Cozzolino, Avneesh Sud, Nicholas Dufour, and Luisa Verdoliva. TruFor: Leveraging all-round clues for trustworthy image forgery detection and localization. In *CVPR*, 2023.
- Kun Guo, Haochen Zhu, and Gang Cao. Effective image tampering localization via enhanced transformer and co-attention fusion. In *ICASSP*, 2024.
- Xuefeng Hu, Zhihan Zhang, Zhenye Jiang, Syomantak Chaudhuri, Zhenheng Yang, and Ram Nevatia. Span: Spatial pyramid attention network for image manipulation localization. In *ECCV*, 2020.
- Konstantinos Triaridis and Vasileios Mezaris. Exploring multi-modal fusion for image manipulation detection and localization. In *MMM*, 2024.
- Haiwei Wu, Jiantao Zhou, Jinyu Tian, and Jun Liu. Robust image forgery detection over online social network shared images. In *CVPR*, 2022.
